# Supplementary material for: Patient Acceptance of Prescribed and Fully Reimbursed mHealth Apps in Germany: An UTAUT2-based Online Survey Study
Source: Springer Nature journal article supplement (doi:10.1007/s10916-023-01910-x), 2023-01-27
Supplement: 10916_2023_1910_MOESM2_ESM.pdf [file 10916_2023_1910_MOESM2_ESM.pdf]

## Multimedia Appendix 2: Review of existing literature on mHealth acceptance

| Authors                                                         | DOI/<br>access link                    | Methods                                                                   | Geography            | Sample<br>size | Model                                                                                                                                | Findings                                                                                                                                                                                                                                                                                                                                                                                                                                                                                                                                                                                                                                                                                                                                                                                     | Effect on BI... |     |     |     |    |    |
|-----------------------------------------------------------------|----------------------------------------|---------------------------------------------------------------------------|----------------------|----------------|--------------------------------------------------------------------------------------------------------------------------------------|----------------------------------------------------------------------------------------------------------------------------------------------------------------------------------------------------------------------------------------------------------------------------------------------------------------------------------------------------------------------------------------------------------------------------------------------------------------------------------------------------------------------------------------------------------------------------------------------------------------------------------------------------------------------------------------------------------------------------------------------------------------------------------------------|-----------------|-----|-----|-----|----|----|
|                                                                 |                                        |                                                                           |                      |                |                                                                                                                                      |                                                                                                                                                                                                                                                                                                                                                                                                                                                                                                                                                                                                                                                                                                                                                                                              | PE              | EE  | FC  | SI  | HM | SE |
| Alam, M. Z.,<br>Hoque, M.<br>R., Hu, W.,<br>& Barua, Z.<br>2020 | 10.1016/j.ji<br>nfomgt.2019<br>.04.016 | Survey<br>among Gen<br>Y                                                  | Bangladesh           | 296            | UTAUT plus<br>price and<br>perceived<br>reliability                                                                                  | Results confirmed that performance expectancy, social influence, facilitating conditions and perceived reliability positively influence the behavioral intention to adopt mHealth services. However, effort expectancy and price value did not have a significance influence on the behavioral intention. Moreover, gender has a significant moderating effect on mHealth services adoption in certain cases                                                                                                                                                                                                                                                                                                                                                                                 | yes             | no  | yes | yes |    |    |
| Boontarig,<br>2016                                              | 10.1109/ICS<br>EC.2016.78<br>59897     | Survey<br>among<br>social media<br>users                                  | Thailand             | 212            | UTAUT<br>model and<br>Big Five<br>personality<br>traits as<br>moderators                                                             | Findings indicate that facilitating conditions and perceived value had a significant effect on behavioral intention to use m- Health information through social media. Conscientiousness acts as moderator for facilitating conditions and perceived value                                                                                                                                                                                                                                                                                                                                                                                                                                                                                                                                   | yes             | yes | yes |     |    |    |
| Breil et al.,<br>2019                                           | 10.3233/SH<br>TI190839                 | Survey<br>among<br>hypertensio<br>n patients in<br>Germany<br>and Austria | Germany &<br>Austria | 145            | UTAUT plus<br>self-efficacy,<br>openness to<br>experience<br>and<br>perceived<br>health threat<br>were<br>analyzed as<br>predictors. | 145 participants (mean age 52.51 years, SD 14.33; 60% female) completed the survey. Acceptance was moderate on average (M = 3.26, SD = 1.07, min 1 to max 5). In a multiple hierarchical regression, performance expectancy and effort expectancy were confirmed as significant predictors of acceptance (step 1, R2 = .57, p < .001), while self-efficacy could not be confirmed (step 2, p = .87). In addition, perceived health threat ( $\beta = .12$ , p < .05) and openness to experience ( $\beta = .22$ , p < .001) had a significant influence on acceptance of mHealth apps for hypertension (step 3, overall model with R2 = .62). Age showed a negative association with the intention to use ( $\beta = .22$ , p = .005) while no influence of gender could be found (p = .06). | yes             | yes |     |     |    | no |
| Cimperman,<br>Makovec<br>Brenčič, &<br>Trkman,<br>2016          | 10.1016/j.ji<br>medinf.2016<br>.03.002 | Survey<br>among<br>citizens<br>aged 50 and<br>above                       | Slovenia             | 400            | UTAUT plus<br>doctor's<br>opinion,<br>computer<br>anxiety, and<br>perceived<br>security as<br>contextual<br>predictors               | Performance expectancy, effort expectancy, facilitating conditions, and perceived security were confirmed having a direct impact on behavioral intention to use home telehealth services.                                                                                                                                                                                                                                                                                                                                                                                                                                                                                                                                                                                                    | yes             | yes | yes |     |    |    |
| Dhiman, N.,<br>Arora, N.,<br>Dogra, N., &<br>Gupta, A.<br>2020. | 10.1108/JIB<br>R-05-2018-<br>0158      | Survey<br>among<br>fitness app<br>users                                   | India                | 324            | UTAUT2<br>plus<br>perceived<br>value, self-<br>efficacy and<br>personal<br>innovativen<br>ess                                        | Significant predictors of smartphone fitness app adoption intention include effort expectancy, social influence, perceived value, habit and personal innovativeness. Further, this study confirms significant relationship between personal innovativeness and habit, self-efficacy and effort expectancy and effort expectancy and performance expectation. This study reveals that personal innovativeness is the strongest predictor of                                                                                                                                                                                                                                                                                                                                                   | no              | yes | no  | yes | no | no |

| Authors                                               | DOI/<br>access link                                                                                             | Methods                        | Geography              | Sample<br>size | Model                                                                                         | Findings                                                                                                                                                                                                                                                                                                                                         | Effect on BI... |     |     |     |     |     |
|-------------------------------------------------------|-----------------------------------------------------------------------------------------------------------------|--------------------------------|------------------------|----------------|-----------------------------------------------------------------------------------------------|--------------------------------------------------------------------------------------------------------------------------------------------------------------------------------------------------------------------------------------------------------------------------------------------------------------------------------------------------|-----------------|-----|-----|-----|-----|-----|
|                                                       |                                                                                                                 |                                |                        |                |                                                                                               |                                                                                                                                                                                                                                                                                                                                                  | PE              | EE  | FC  | SI  | HM  | SE  |
|                                                       |                                                                                                                 |                                |                        |                |                                                                                               | behavioural intention. Contrary to the expectations, factors like performance expectancy, facilitating conditions and hedonic motivation did not influence .behavioural intention                                                                                                                                                                |                 |     |     |     |     |     |
| Duarte, P., & Pinho, J. C. 2019.                      | 10.1016/j.jbusres.2019.05.022                                                                                   | Survey among mHealth users     | Portugal               | 120            | UTAUT2                                                                                        | The findings are that performance expectancy (PE) plus habit (HT), and performance expectancy (PE) plus hedonic motivation (HM) are actually necessary conditions for mHealth adoption.                                                                                                                                                          |                 |     |     |     | yes |     |
| Dwivedi, Shareef, Simintiras, Lal, & Weerakkody, 2016 | 10.1016/j.giq.2015.06.003                                                                                       | Survey among diabetic patients | Bangladesh, US, Canada | 1158           | UTAUT2 plus waiting time and self-concept                                                     | Hedonic motivation was not significant for the US and Canadian users, self-concept was significant for Bangladeshi users. Effort expectancy and facilitating conditions are the two major contributors regardless of the country.                                                                                                                |                 | yes | yes |     | no  |     |
| Dzimiera, 2017                                        | <a href="https://repositorio.ucp.pt/handle/10400.14/22772">https://repositorio.ucp.pt/handle/10400.14/22772</a> | Broad population survey        | Germany                | 295            | UTAUT plus self-efficacy, privacy and security risk, surveillance anxiety, and physical risk. | Effort expectancy, privacy and security risk, and physical risk have no significant effect on the behavioral intention to use mHealth. Performance expectancy is the major predictor. Self- efficacy was found to be a good predictor of effort expectancy (R2 = 0.639).                                                                         | yes             | no  |     |     |     | yes |
| Hoque & Sorwar, 2017                                  | 10.1016/j.jmedinf.2017.02.002                                                                                   | Broad population survey        | Bangladesh             | 274            | UTAUT plus technology anxiety and resistance to change                                        | The study determined that performance expectancy, effort expectancy, social influence, technology anxiety, and resistance to change have a significant impact on the users' behavioral intention to adopt mHealth services. Conversely, facilitating condition revealed having no significant relation with behavioral intention to use mHealth. | yes             | yes | no  | yes |     |     |
| Idrish, Rifat, Iqbal, & Nisha, 2017                   | 10.4018/IJTHI.2017040101                                                                                        | Broad population survey        | Bangladesh             | 908            | UTAUT plus personal innovativeness, perceived self-efficacy, and perceived financial cost     | Findings suggest self-efficacy, facilitating conditions, effort expectancy and performance expectancy to influence users' behavioral intention to adopt mobile health services, with age and gender acting as moderators.                                                                                                                        | yes             | yes | yes |     |     | yes |
| Jewer, 2018                                           | 10.1016/j.jmedinf.2018.01.008                                                                                   | Survey among hospital patients | Canada                 | 118            | UTAUT                                                                                         | The results show significant effects in performance expectancy and facilitating conditions on behavioral intention to use an emergency department wait-times website, while the effort expectancy impact was not found significant.                                                                                                              | yes             | no  | yes |     |     |     |
| Kenny & Connolly, 2017                                | ISBN: 9780991556700                                                                                             | Survey                         | Ireland, US            | 450            | Performance expectancy and social                                                             | The model explained 65.5% of the variance in adoption intention for the whole sample. The mHealth self-efficacy and health status did not present a significant effect on the intention to adopt mHealth.                                                                                                                                        |                 |     |     |     |     | no  |

| Authors                     | DOI/<br>access link          | Methods                                                          | Geography  | Sample<br>size | Model                                                                               | Findings                                                                                                                                                                                                                                                                                                                                                                                                                                                                                                               | Effect on BI... |     |     |     |     |    |     |
|-----------------------------|------------------------------|------------------------------------------------------------------|------------|----------------|-------------------------------------------------------------------------------------|------------------------------------------------------------------------------------------------------------------------------------------------------------------------------------------------------------------------------------------------------------------------------------------------------------------------------------------------------------------------------------------------------------------------------------------------------------------------------------------------------------------------|-----------------|-----|-----|-----|-----|----|-----|
|                             |                              |                                                                  |            |                |                                                                                     |                                                                                                                                                                                                                                                                                                                                                                                                                                                                                                                        | PE              | EE  | FC  | SI  | HM  | SE |     |
|                             |                              |                                                                  |            |                | influence from UTAUT plus mHealth self-efficacy, healthcare need, and health status |                                                                                                                                                                                                                                                                                                                                                                                                                                                                                                                        |                 |     |     |     |     |    |     |
| Koivumäki et al., 2017      | 10.2196/jmir.7821            | Survey among faculty and staff of university of Oulu             | Finland    | 855            | UTAUT2 plus health belief model                                                     | Effort expectancy (beta=.191, P<.001), self-efficacy (beta=.449, P<.001), threat appraisals (beta=.416, P<.001), and perceived barriers (beta=-.212, P=.009) are significant predictors of intention to use mHealth technologies.                                                                                                                                                                                                                                                                                      |                 | yes |     |     |     |    | yes |
| Macedo, 2017                | 10.1016/j.chb.2017.06.013    | Survey among adults aged 55 and older                            | Portugal   | 278            | UTAUT2                                                                              | Results confirm that most UTAUT2 predictors, some of them directly (behavioral intention, habit) and others indirectly (performance expectancy, effort expectancy, social influence, facilitating conditions, hedonic motivation) influence intention to use mHealth.                                                                                                                                                                                                                                                  |                 | yes | yes | yes | yes |    |     |
| Moon & Hwang, 2016          | 10.1007/978-3-662-47895-0_38 | Survey among college students                                    | Korea      | 126            | UTAUT plus personal innovativeness and perceived enjoyment                          | Findings suggest that social influence positively affects user intention to use, and that performance expectancy is positively correlated with the intention to use. Perceived enjoyment positively affects the potential intention to use the services. Personal innovativeness, effort expectancy, and facilitating conditions did show a significant effect on intention to use.                                                                                                                                    | yes             | no  | yes | yes | yes |    |     |
| Nisha, Iqbal, & Rifat, 2019 | 10.4018/JGIM.2019010102      | Survey among urban smartphone users                              | Bangladesh | 927            | UTAUT plus system quality (system reliability, system                               | Facilitating conditions was found to be the strongest direct determinant in influencing behavioral intention of mHealth services adoption. Additionally, effort expectancy, facilitating conditions, performance expectancy, and trust were also statistically found to be predictors of the behavioral intention to use mHealth                                                                                                                                                                                       |                 | yes | yes |     |     |    |     |
| Nunes, Limpo & Castro, 2019 | 10.3389/fpsyg.2019.02791     | Survey study among smartphone users that do not use mHealth apps | Portugal   | 574            | UTAUT                                                                               | Results showed that the intention to use mobile health applications was determined by performance expectancy moderated by age and smartphone experience, and that the role of the other determinants depended on age and gender (e.g., more intention to use in older men if less effort, and in younger men if better facilitating conditions). These findings show that user characteristics are relevant moderators and should be considered when targeting specific populations to use mobile health applications. | yes             |     |     |     |     |    |     |
| Quaosar, Hoque, & Bao, 2018 | 10.1089/tmj.2017.0111        | Broad population survey                                          | Bangladesh | 245            | UTAUT plus perceived credibility                                                    | Findings indicate that performance expectancy, effort expectancy, social influence, and perceived credibility significantly influence the elderly's intention to use mHealth services. Facilitating conditions has no significant influence.                                                                                                                                                                                                                                                                           | yes             | yes | no  | yes |     |    |     |

| Authors                                                     | DOI/<br>access link           | Methods                                                 | Geography | Sample<br>size | Model                                                                                                      | Findings                                                                                                                                                                                                                                                                                                                                                                                                                                                                                                                                                                                                                                                                        | Effect on BI... |     |    |     |     |    |
|-------------------------------------------------------------|-------------------------------|---------------------------------------------------------|-----------|----------------|------------------------------------------------------------------------------------------------------------|---------------------------------------------------------------------------------------------------------------------------------------------------------------------------------------------------------------------------------------------------------------------------------------------------------------------------------------------------------------------------------------------------------------------------------------------------------------------------------------------------------------------------------------------------------------------------------------------------------------------------------------------------------------------------------|-----------------|-----|----|-----|-----|----|
|                                                             |                               |                                                         |           |                |                                                                                                            |                                                                                                                                                                                                                                                                                                                                                                                                                                                                                                                                                                                                                                                                                 | PE              | EE  | FC | SI  | HM  | SE |
| Rajak & Shaw, 2021                                          | 10.1016/j.techsoc.2021.101800 | Survey among mHealth service users in India             | India     | 289            | TAM plus SI, technology anxiety, trust, perceived risk, perceived physical condition, resistance to change | The adoption of mHealth was found to have had an enormous impact on social influence, behavioural intention and trust.                                                                                                                                                                                                                                                                                                                                                                                                                                                                                                                                                          |                 |     |    | yes |     |    |
| Ravangard, Kazemi, Zaker Abbasali, Sharifian, & Monem, 2017 | 10.19082/3862                 | Survey among users of laboratory e-services             | Iran      | 170            | Hedonic motivation, price value, and habit of the UTAUT2 plus usability, and ability to use the technology | The findings suggest that price value, hedonic motivation, habit, and usability have a significant influence on the intention to use mHealth portals.                                                                                                                                                                                                                                                                                                                                                                                                                                                                                                                           |                 |     |    |     | yes |    |
| Salgado, Tavares & Oliveira, 2020                           | 10.2196/17588                 | Survey among students and chronically diseased patients | Portugal  | 322            | UTAUT2 + personal empowerment                                                                              | The drivers of behavior intention with statistical significance were performance expectancy ( $\beta=.29$ , $P<.001$ ), habit ( $\beta=.39$ , $P<.001$ ), and personal empowerment ( $\beta=.18$ , $P=.01$ ). The precursors of use behavior were habit ( $\beta=.47$ , $P<.001$ ) and personal empowerment ( $\beta=.17$ , $P=.01$ ). Behavior intention to recommend was significantly influenced by behavior intention ( $\beta=.58$ , $P<.001$ ) and personal empowerment ( $\beta=.26$ , $P<.001$ ). The model explained 66% of the total variance in behavior intention, 54% of the variance in use behavior, and 70% of the variance in behavior intention to recommend. | yes             |     |    |     |     |    |
| Schomakers, E. M., Lidynia, C., & Ziefle, M. 2019           | 10.1007/978-3-319-94619-1_6   | Broad population survey                                 | Germany   | 165            | UTAUT2 and selected barriers (privacy concerns)                                                            | Use intention, performance expectancy (PE), effort expectancy (EE), social influence (SI), facilitating conditions (FC), as well as privacy concerns for a fitness app (lifestyle context) and a diabetes app (medical context). Structural equation modeling is used to assess the relevance of influences on adoption intention in these contexts. Results show that acceptance factors indeed differ strongly between lifestyle and medical contexts. For the latter, only PE and SI determine intention to use, although privacy concerns are higher than in the lifestyle context.                                                                                         |                 |     |    | yes |     |    |
| Tao et al., 2020                                            | 10.1016/j.chb.2019.09.023     | Meta-analysis                                           |           |                | TAM                                                                                                        | Attitude was the strongest predictor of behavioral intention ( $\beta = 0.64$ ), followed by perceived usefulness ( $\beta = 0.41$ ), self-efficacy ( $\beta = 0.24$ ), perceived ease of use ( $\beta = 0.21$ ), subjective norm ( $\beta = 0.19$ ), trust ( $\beta = 0.17$ ), and                                                                                                                                                                                                                                                                                                                                                                                             | yes             | yes | no | yes |     |    |

| Authors | DOI/<br>access link | Methods | Geography | Sample<br>size | Model | Findings                                                                                                                                                                                                                                                                                                                                                                                                                                                                                                                                              | Effect on BI... |    |    |    |    |    |
|---------|---------------------|---------|-----------|----------------|-------|-------------------------------------------------------------------------------------------------------------------------------------------------------------------------------------------------------------------------------------------------------------------------------------------------------------------------------------------------------------------------------------------------------------------------------------------------------------------------------------------------------------------------------------------------------|-----------------|----|----|----|----|----|
|         |                     |         |           |                |       |                                                                                                                                                                                                                                                                                                                                                                                                                                                                                                                                                       | PE              | EE | FC | SI | HM | SE |
|         |                     |         |           |                |       | perceived behavioral control ( $\beta = 0.14$ ). Perceived usefulness could be predicted by subjective norm ( $\beta = 0.23$ ) and trust ( $\beta = 0.43$ ), while perceived ease of use could be predicted by self-efficacy ( $\beta = 0.51$ ). Specifically, all the synthesized relationships from the two types of coefficients were positive and statistically significant, except that the synthesized correlation of facilitating conditions- behavioral intention is significant, while its synthesized path coefficient is non- significant. |                 |    |    |    |    |    |
